# Supplementary material for: Action-value comparisons in the dorsolateral prefrontal cortex control choice between goal-directed actions
Source: PubMed Central journal article supplement — Nat Commun. 2014 Jul 23;5:4390. doi: 10.1038/ncomms5390 (PMC4124863; doi:10.1038/ncomms5390), 2014-07-23
Supplement: ncomms5390-s1.pdf [file ncomms5390-s1.pdf]

Supplementary Figure 1. Individual Fits

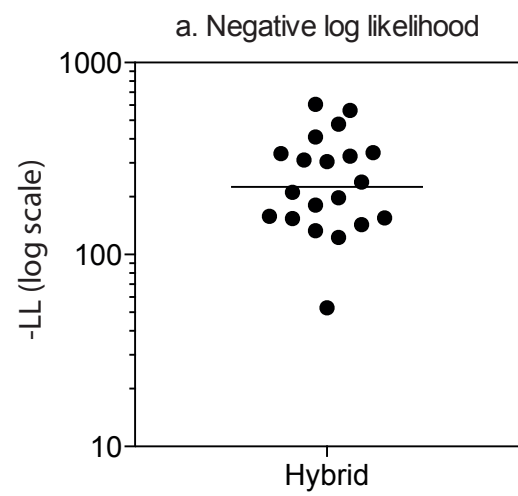

Negative log likelihood (-LL) of the best fit by maximum likelihood for each individual from the hybrid model

## Supplementary Figure 2. Models

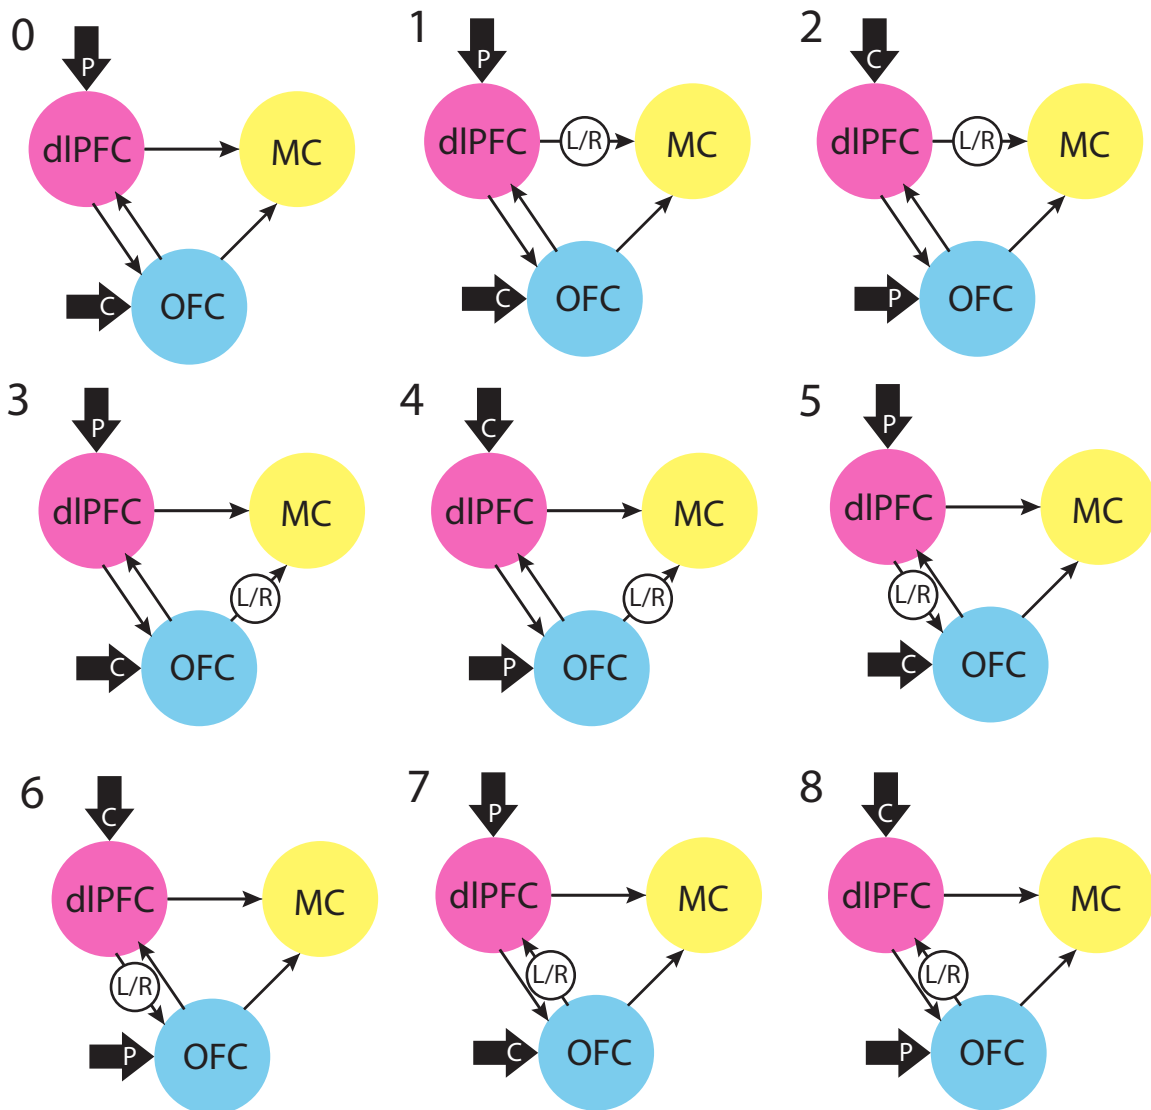

Dynamic causal models showing regions-of-interest (dIPFC: dorsolateral prefrontal cortex; OFC: medial orbitofrontal cortex; MC: motor cortex), driving inputs (P: relative advantage values; C: chosen action values), and modulatory coupling in an action-specific manner (L/R).

### Supplementary Figure 3. Caudate correlations

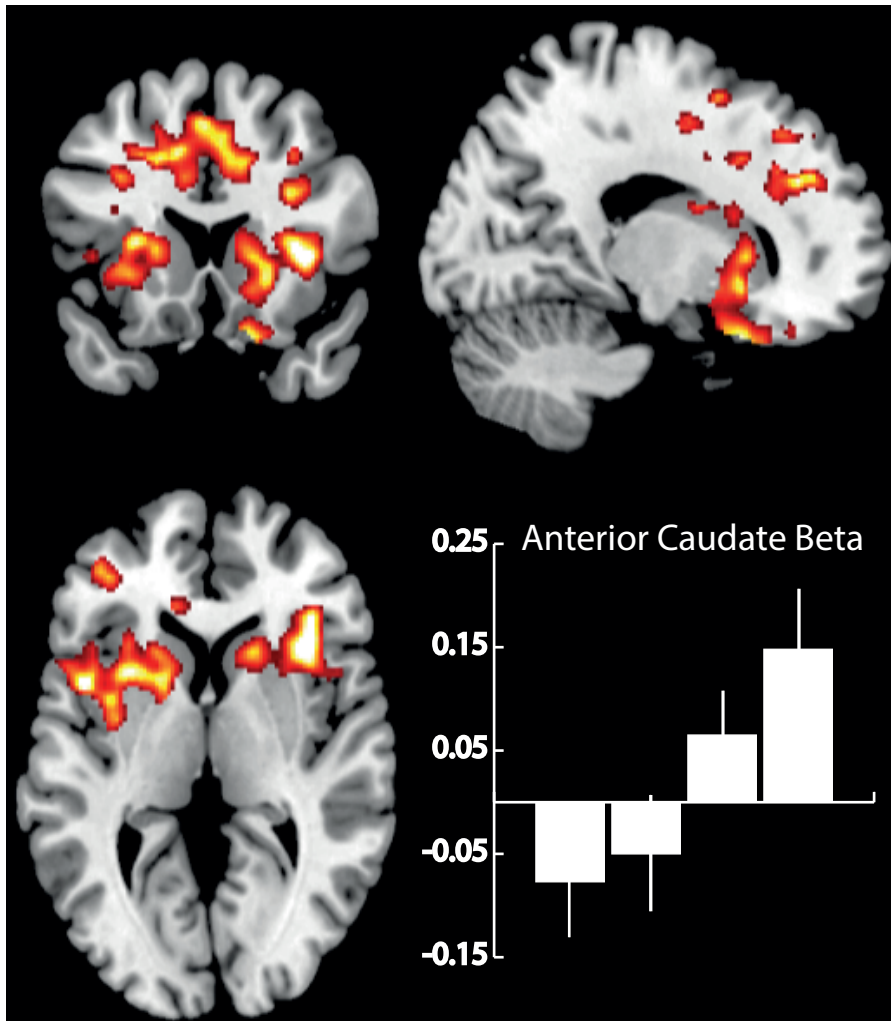

Regions tracking the local correlation between response rate and reward. Bar chart (above) shows beta values extracted from an anatomical ROI in the anterior caudate linearly increased with the local correlation.

**Supplementary Table 1. Estimated parameters and pseudo  $r^2$  for each subject.**

| Subject | $R^2$ | $\alpha$ | $\kappa$ | $\tau_p$ | $\tau_q$ |
|---------|-------|----------|----------|----------|----------|
| 01      | 0.612 | 0.000    | 2.312    | 1.769    | 9.717    |
| 02      | 0.824 | 0.022    | 3.535    | 1.041    | 6.669    |
| 03      | 0.785 | 0.025    | 3.320    | 0.788    | 6.392    |
| 04      | 0.807 | 0.099    | 3.303    | 0.649    | 6.786    |
| 05      | 0.317 | 0.000    | 1.453    | 0.693    | 3.432    |
| 06      | 0.606 | 0.001    | 2.398    | 0.962    | 53.059   |
| 07      | 0.820 | 0.000    | 3.659    | 1.741    | 100.000  |
| 08      | 0.719 | 0.000    | 3.012    | 0.707    | 2.082    |
| 09      | 0.188 | 0.001    | 1.059    | 0.241    | 100.000  |
| 10      | 0.698 | 0.122    | 2.584    | 2.130    | 7.822    |
| 11      | 0.835 | 0.104    | 3.554    | 0.979    | 5.799    |
| 12      | 0.901 | 0.106    | 1.998    | 0.000    | 47.204   |
| 13      | 0.663 | 0.000    | 2.704    | 1.241    | 100.000  |
| 14      | 0.318 | 0.106    | 1.477    | 0.097    | 1.844    |
| 15      | 0.468 | 0.072    | 1.921    | 0.515    | 3.389    |
| 16      | 0.341 | 0.011    | -2.088   | 2.758    | 67.652   |
| 17      | 0.008 | 0.029    | -0.117   | 0.375    | 4.217    |
| 18      | 0.506 | 0.000    | 2.028    | 0.826    | 14.521   |
| 19      | 0.738 | 0.052    | 2.902    | 1.065    | 9.352    |
| 20      | 0.796 | 0.067    | 3.438    | 1.972    | 9.157    |
| Median  | 0.681 | 0.050    | 2.754    | 0.894    | 8.489    |

Pseudo  $R^2$  and individual best fitting model parameters ( $\alpha$ ,  $\kappa$  and  $\tau$ ) for the hybrid model.

**Supplementary Table 2. Pearson correlations (r) between  $P$  and  $D$  and  $\pi$  signals**

| Subject | $P * D$ | $P * \pi$ |
|---------|---------|-----------|
| 001     | 0.864   | 0.520     |
| 002     | 0.340   | 0.093     |
| 003     | 0.237   | -0.050    |
| 004     | 0.077   | -0.023    |
| 005     | 0.810   | 0.287     |
| 006     | 0.661   | 0.270     |
| 007     | 0.626   | 0.251     |
| 008     | 0.625   | 0.126     |
| 009     | 0.749   | 0.057     |
| 010     | 0.555   | 0.363     |
| 011     | 0.240   | 0.087     |
| 012     | -0.495  | -0.621    |
| 013     | 0.762   | 0.266     |
| 014     | 0.590   | 0.061     |
| 015     | 0.618   | 0.187     |
| 016     | 0.831   | 0.284     |
| 017     | 0.854   | 0.187     |
| 018     | 0.770   | 0.238     |
| 019     | 0.076   | -0.045    |
| 020     | -0.016  | -0.039    |

**Supplementary Table 3. Recovered Q-learning parameters**

| simulation | $\alpha$ | $\tau_q$ | $\kappa$ |
|------------|----------|----------|----------|
| 1          | 0.014    | 14.256   | 1.823    |
| 2          | 0.016    | 13.073   | 1.814    |
| 3          | 0.016    | 12.943   | 1.766    |
| 4          | 0.015    | 12.979   | 1.789    |
| 5          | 0.012    | 15.151   | 1.821    |
| 6          | 0.012    | 15.151   | 1.821    |
| 7          | 0.017    | 12.949   | 1.843    |
| 8          | 0.016    | 12.952   | 1.793    |
| 9          | 0.015    | 13.625   | 1.784    |
| 10         | 0.013    | 14.357   | 1.804    |
| 11         | 0.018    | 11.794   | 1.833    |
| 12         | 0.015    | 14.083   | 1.782    |
| 13         | 0.017    | 12.455   | 1.826    |
| 14         | 0.013    | 14.711   | 1.797    |
| 15         | 0.011    | 16.056   | 1.842    |
| Mean       | 0.015    | 13.769   | 1.809    |
| SD         | 0.002    | 1.177    | 0.023    |

Mean recovered parameters from the Q-learning model derived from 15 simulations using the same parameters to generate  $D$  signals for the fMRI analysis ( $\alpha = 0.015$ ,  $\tau_q = 13.407$ , and  $\kappa = 1.811$ ). The results show the parameters can be recovered accurately from choice data. Note the  $P$  signal was not dependent on the parameters and so no simulation was performed.
